# Supplementary material for: Mutational analysis of phenolic acid decarboxylase from Bacillus subtilis (BsPAD), which converts bio-derived phenolic acids to styrene derivatives
Source: Royal Society of Chemistry journal article supplement (doi:10.1039/c2cy20015e), 2012-01-01
Supplement: c2cy20015e.pdf [file c2cy20015e.pdf]

# Mutational Analysis of Phenolic Acid Decarboxylase from *Bacillus subtilis* (BsPAD), which Converts Bio-derived Phenolic Acids to Styrene Derivatives

Annika Frank,<sup>a</sup> William Eborall,<sup>a</sup> Ralph Hyde,<sup>a</sup> Sam Hart,<sup>a</sup> Johan P. Turkenburg<sup>a</sup> and Gideon Grogan<sup>a\*</sup>

<sup>a</sup> *Department of Chemistry, University of York, Heslington, York, U.K. YO10 5DD; E-mail: gideon.grogan@york.ac.uk*

**Supporting Information**

| Variant         | Forward Primer                                          | Reverse Primer                                          |
|-----------------|---------------------------------------------------------|---------------------------------------------------------|
| WT              | CCAGGGACCAGCAAGGAAAACCTTTA<br>TCGGAAGCCACATGATTTTATACGT | GAGGAGAAGGCGCGTTATTATAATC<br>TTCCCGCGCGAATATCGTCTGTTCAT |
| Y11F            | CGGAAGCCACATGATTTTACGTAT<br>GAAAACGGATG                 | CATCCGTTTTTCATACGTAAAAATCA<br>TGTGGCTTCCG               |
| Y13F            | GAAGCCACATGATTTTATACGTTTGA<br>AAACGGATGGGAATACG         | CGTATTCCCATCCGTTTTCAAACGTA<br>TAAATCATGTGGCTTC          |
| Y19A            | CGTATGAAAACGGATGGGAAGCGG<br>AGATTTATATTA AAAACGAC       | GTCGTTTTTAATATAAATCTCCGCTT<br>CCCATCCGTTTTTCATACG       |
| R41A            | CATAGCGGAATGGTTGCCGGAGCGT<br>GGGTTTCGAGATCAGGAAGTG      | CACTTCCTGATCTCGAACCCACGCT<br>CCGGCAACCATTCCGCTATG       |
| E64A            | TATAAAGTGTCTTGGACAGCGCCGA<br>CTGGCACGGATGTTT            | AAACATCCGTGCCAGTCGGCGCTGT<br>CCAAGACACTTTATA            |
| T68V            | GGACAGAGCCGACTGGCGTGGATGT<br>TTCATTAAAC                 | GTTTAATGAAACATCCACGCCAGTC<br>GGCTCTGTCC                 |
| T98A            | GCATGAACATCCTGAAATTGCGGTT<br>TGCTACCAA AATG             | CATTTTGGTAGCAAACCGCAATTTT<br>AGGATGTTCATGC              |
| Y11F/<br>Y13F * | CTTTATCGGAAGCCACATGATTTTTA<br>CGTTTGAAAACGGATGGGAATAC   | TATTCCCATCCGTTTTCAAACGTAAA<br>AATCATGTGGCTTCCGATAAAG    |

Table S1. Primers used for PCR in amplification of gene encoding *BsPAD* from genomic DNA of *B. subtilis* and subsequent site-directed mutagenesis experiments using the plasmid encoding the WT as a template. \*Primers containing two mutagenic codons were used in this instance.

---

| <i>BsPAD</i> complexed with coumaric acid |                                 |
|-------------------------------------------|---------------------------------|
| Beamline                                  | Diamond io4 , 23rd October 2010 |
| Wavelength (Å)                            | 0.9763 Å                        |
| Resolution (Å)                            | 53.60-3.03 (3.10-3.03)          |
| Space Group                               | $P3_221$                        |
| Unit cell (Å)                             | a = b = 107.21; c = 92.80       |
| Unique reflections                        | 11708 (778)                     |
| Completeness (%)                          | 99.2 (98.2)                     |
| $R_{\text{merge}}$ (%)                    | 0.11 (0.86)                     |
| $R_{\text{p.i.m.}}$                       | 0.051 (0.39)                    |
| Multiplicity                              | 10.8 (11.0)                     |
| $\langle I/\sigma(I) \rangle$             | 21.4 (3.3)                      |
| Protein atoms                             | 3852                            |
| $R_{\text{cryst}}/R_{\text{free}}$ (%)    | 20.1/ 26.3                      |
| r.m.s.d 1-2 bonds (Å)                     | 0.011                           |
| r.m.s.d 1-3 angles (°)                    | 1.44                            |
| Avg B (Å <sup>2</sup> )                   | 52                              |

---

Table S2. Data Collection and Refinement Statistics for Tyr19Ala mutant of *BsPAD* complexed with coumaric acid

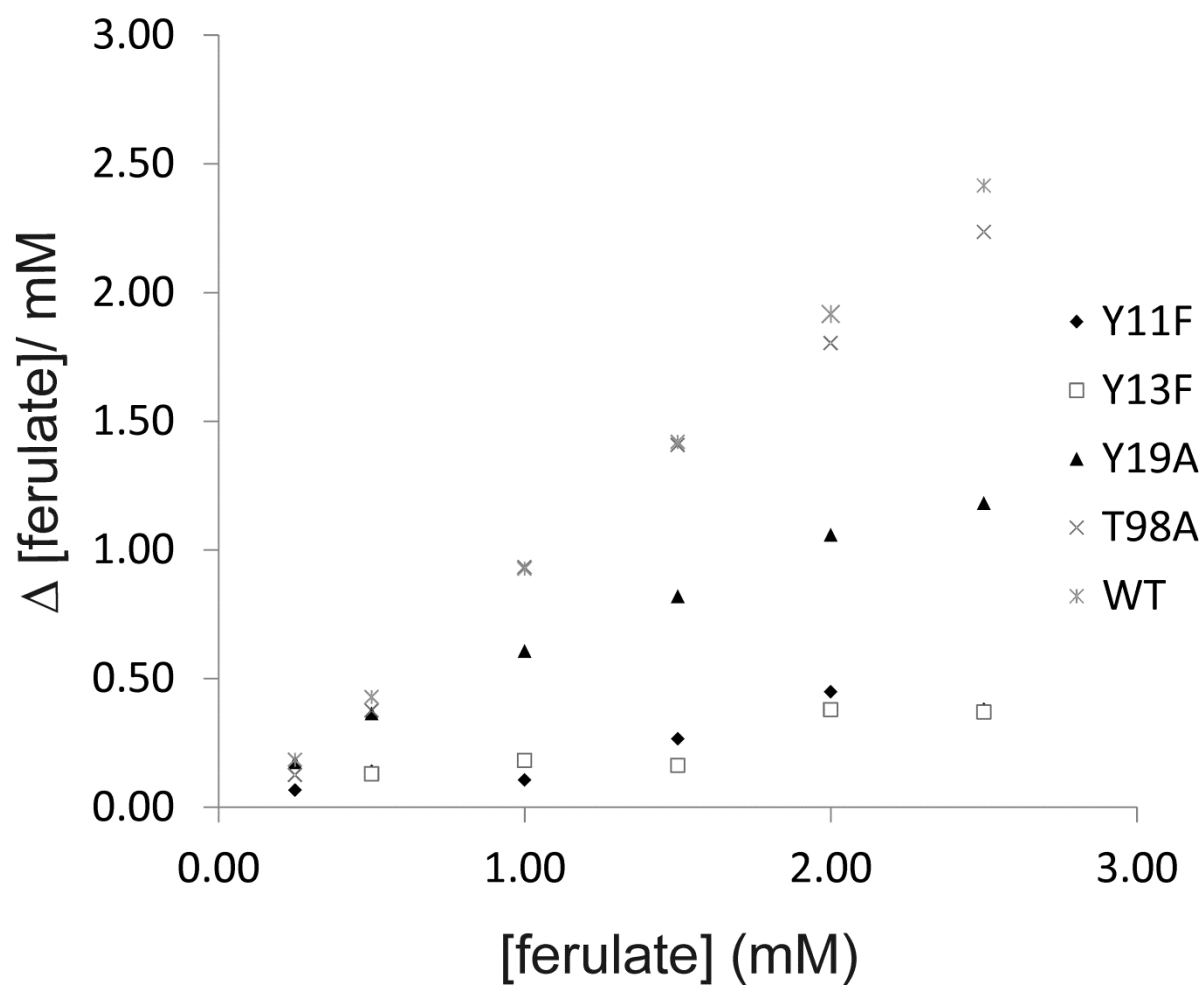

Figure S1. Graph illustrating results of an HPLC-based kinetic study of wild-type *BsPAD* using ferulic acid as substrate. Experiments were carried out as detailed in the Experimental Section.
